# Supplementary material
Source: publisher site journal article supplement (https://www.dovepress.com/article/335123)
Supplement: Supplementary file 1 [file get_supplementary_file.php]

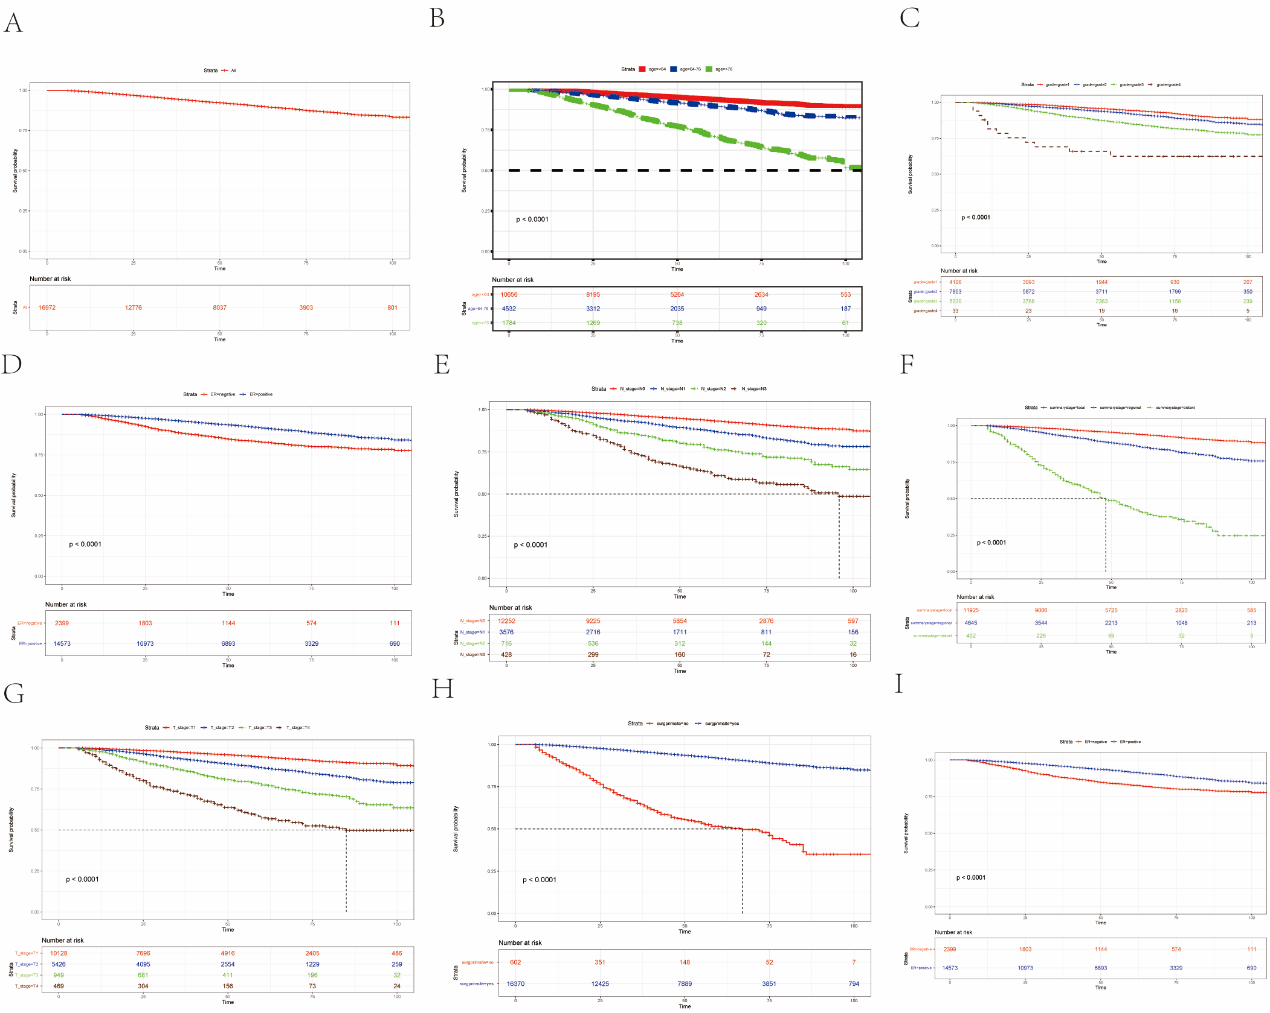


**Figure S1** The survival analyses are based on each variable in the BC cohort.


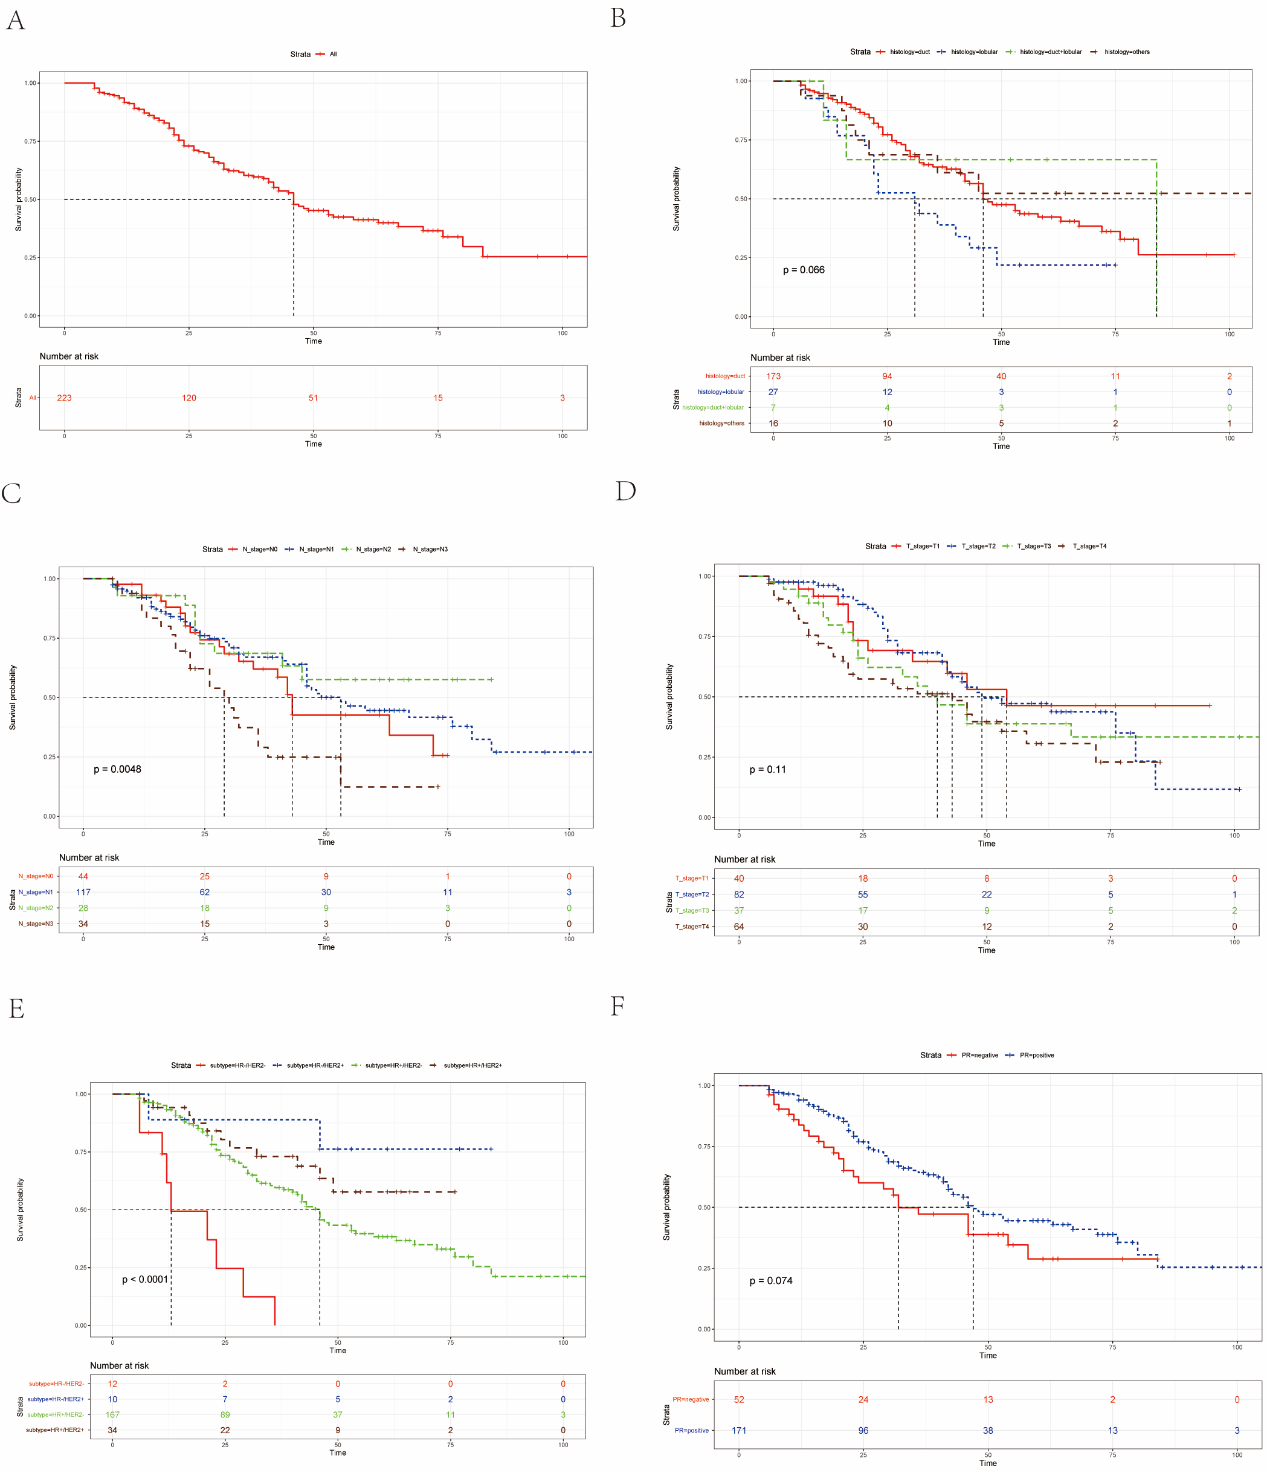


**Figure S2** The survival analyses are based on each variable in the BCBM cohort.
